# Supplementary material for: Zinc Oxide Loaded Cellulose-based Carbon Gas Sensor for Selective Detection of Ammonia
Source: Preprints.org preprint supplement (doi:10.20944/preprints202311.0857.v1), 2023-11-14
Supplement: Supplementary file 3 [file supplementary]

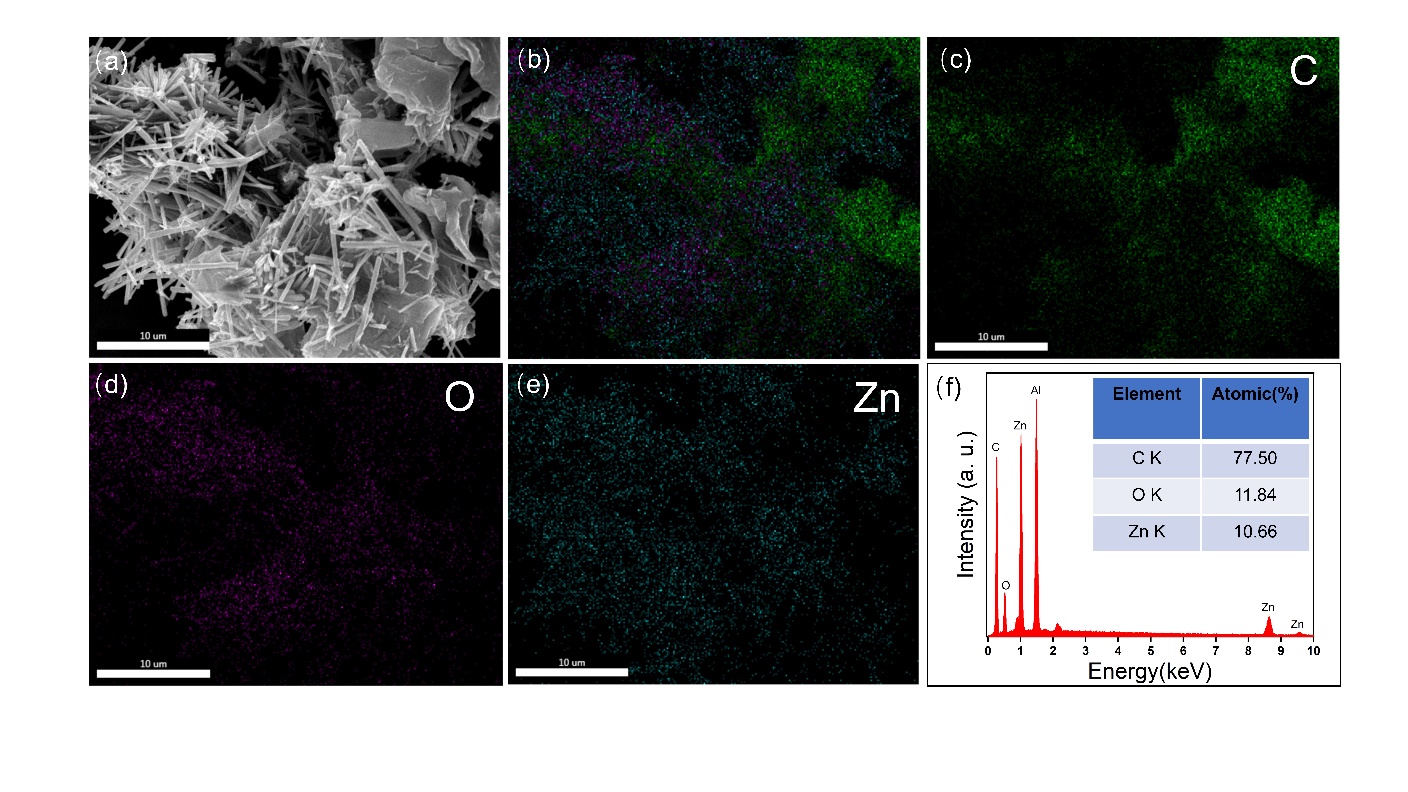


Figure S1. (a-e) SEM images of the ZnO/CBC-60% and corresponding mapping images of C, O and Zn; (f) the EDS analysis of the prepared ZnO/CBC-60%.


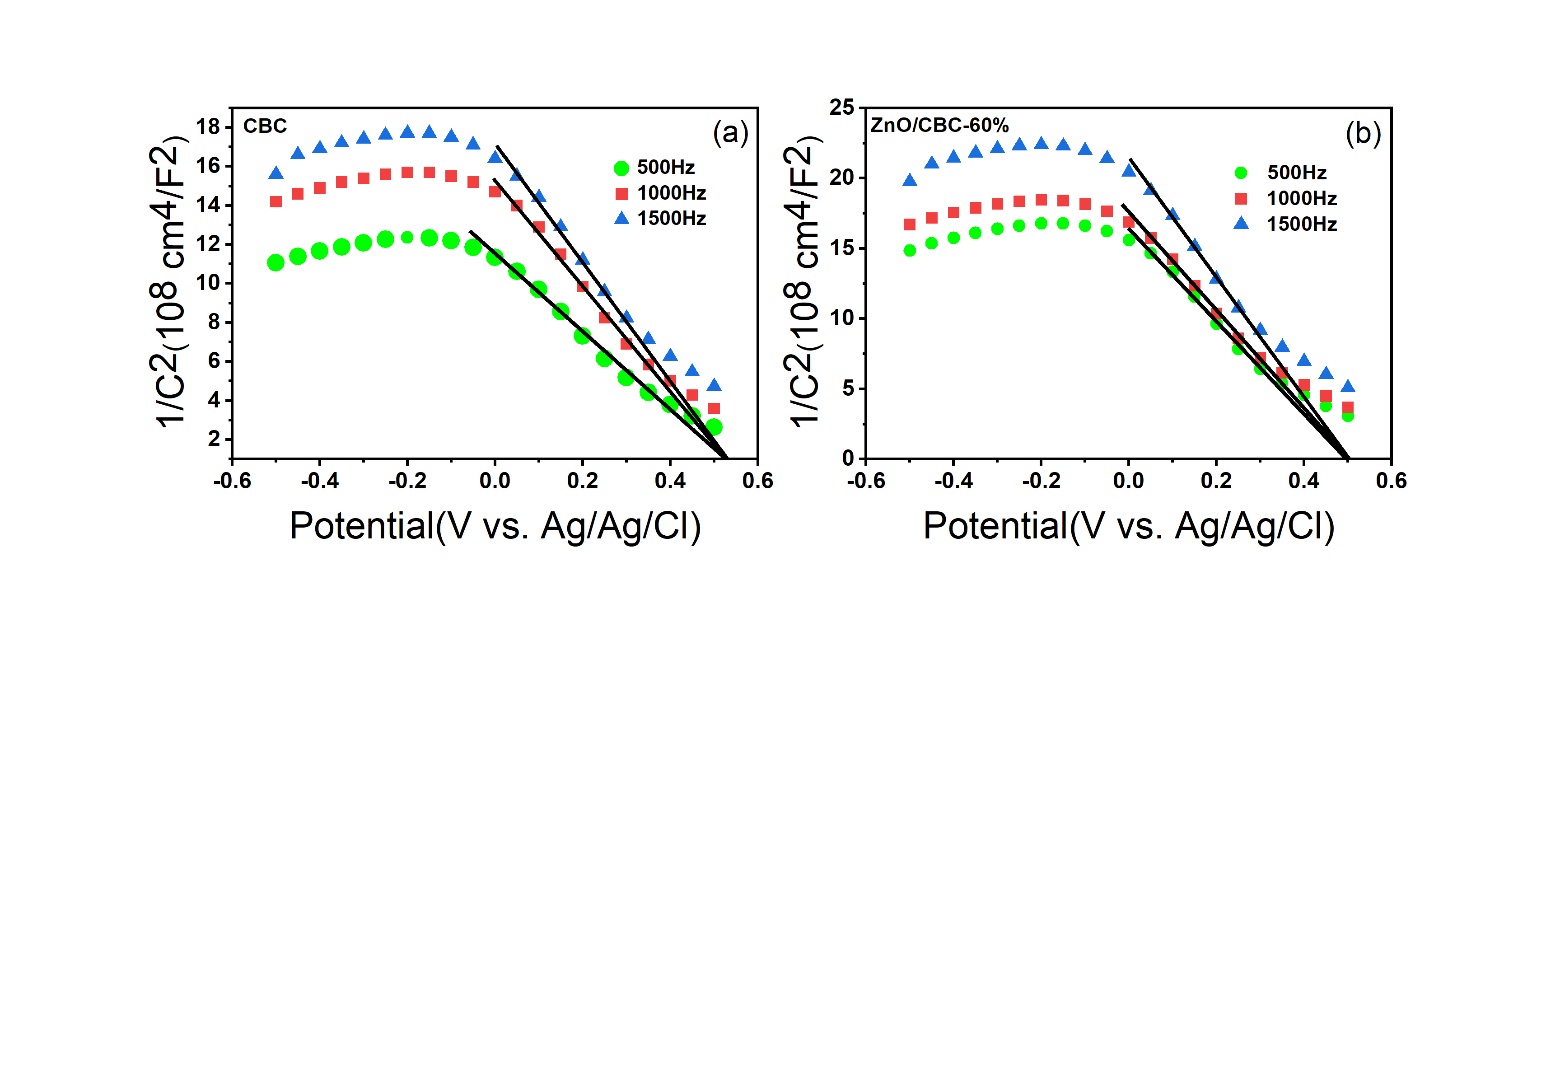


Figure S2. Mott-Schottky curves of (a) CBC, (b) ZnO/CBC-60%
